# Supplementary material
Source: Springer Nature journal article supplement (https://www.springermedizin.de/resource/supplementary/12877_2010_328_MOESM1_ESM.pdf/9439396)
Supplement: MOESM1 [file 9439396]

Initial BELFRAIL Cohort  
**n = 591**  
- 193 Wallony  
- 75 Brussels  
- 323 Flanders

- refusals n = 19  
- deaths n = 5

Definitive BELFRAIL cohort  
**n = 567**  
- 187 Wallony  
- 73 Brussels  
- 307 Flanders

Visit General Practitioner  
**n = 565**

Visit CRA  
**n = 560**

Visit Echocardiographer  
**n = 556**

Blood test  
**n = 553**
